# Supplementary material for: A nonanuclear copper(II) cluster incorporating endogenous alkoxo- and exogenous hydroxo bridges containing [Cu3(μ3-OH)] cores
Source: Royal Society of Chemistry journal article supplement (doi:10.1039/b900711c), 2009-01-01
Supplement: b900711c.pdf [file b900711c.pdf]

## Supplementary Material

Table S1. Hydrogen Bonded Distances in **1**

| <b>D-H...A</b>         | <b>d(D-H) / Å</b> | <b>d(H...A) / Å</b> | <b>d(D...A) / Å</b> | <b>Angle (DHA) / °</b> |
|------------------------|-------------------|---------------------|---------------------|------------------------|
| O(60)--H(60) ..O(7)    | 0.71              | 2.16                | 2.8425              | 159                    |
| O(80)--H(80) ..O(74)   | 0.84              | 2.00                | 2.8277              | 169                    |
| O(90)--H(90) ..O(80)   | 0.84              | 1.92                | 2.7370              | 165                    |
| O(100)--H(100) ..O(90) | 0.84              | 1.87                | 2.7068              | 173                    |
|                        |                   |                     |                     |                        |
